# Supplementary material for: Highly concentrated trehalose induces prohealing senescence-like state in fibroblasts via CDKN1A/p21
Source: PubMed Central journal article supplement (PMC9822918; doi:10.1038/s42003-022-04408-3), 2023-01-06
Supplement: 42003_2022_4408_MOESM2_ESM.pdf [file 42003_2022_4408_MOESM2_ESM.pdf]

# Supplemental Information

## Highly concentrated trehalose induces prohealing senescence-like state in fibroblasts via CDKN1A/p21

**Authors:** Jun Muto<sup>1\*</sup>, Shinji Fukuda<sup>2</sup>, Kenji Watanabe<sup>3</sup>, Xiuju Dai<sup>1</sup>, Teruko Tsuda<sup>1</sup>, Takeshi Kiyoi<sup>4</sup>, Kenji Kameda<sup>1</sup>, Ryosuke Kawakami<sup>5</sup>, Hideki Mori<sup>1</sup>, Ken Shiraishi<sup>1</sup>, Masamoto Murakami<sup>1</sup>, Takeshi Imamura<sup>5, 6</sup>, Shigeki Higashiyama<sup>7, 8</sup>, Yasuhiro Fujisawa<sup>1</sup>, Yoichi Mizukami<sup>3</sup>, Koji Sayama<sup>1</sup>

**Affiliations:**

<sup>1</sup>Department of Dermatology, Ehime University Graduate School of Medicine; Toon, Japan.

<sup>2</sup>Department of Biochemistry, School of Dentistry, Aichi Gakuin University; Nagoya, Japan.

<sup>3</sup>Institute of Gene Research, Yamaguchi University Science Research Center; Yamaguchi, Japan.

<sup>4</sup>Department of Pharmacology, School of Medicine, Kanazawa Medical University, Uchinada, Japan.

<sup>5</sup>Department of Molecular Medicine for Pathogenesis, Ehime University Graduate School of Medicine; Toon, Japan

<sup>6</sup>Translational Research Center, Ehime University Hospital; Toon, Japan

<sup>7</sup>Division of Cell Growth and Tumor Regulation, Proteo-Science Center, Ehime University; Toon, Japan.

<sup>8</sup>Department of Molecular and Cellular Biology, Osaka International Cancer Institute; Osaka, Japan.

\*Corresponding author. Email: [muto.jun.xs@ehime-u.ac.jp](mailto:muto.jun.xs@ehime-u.ac.jp)

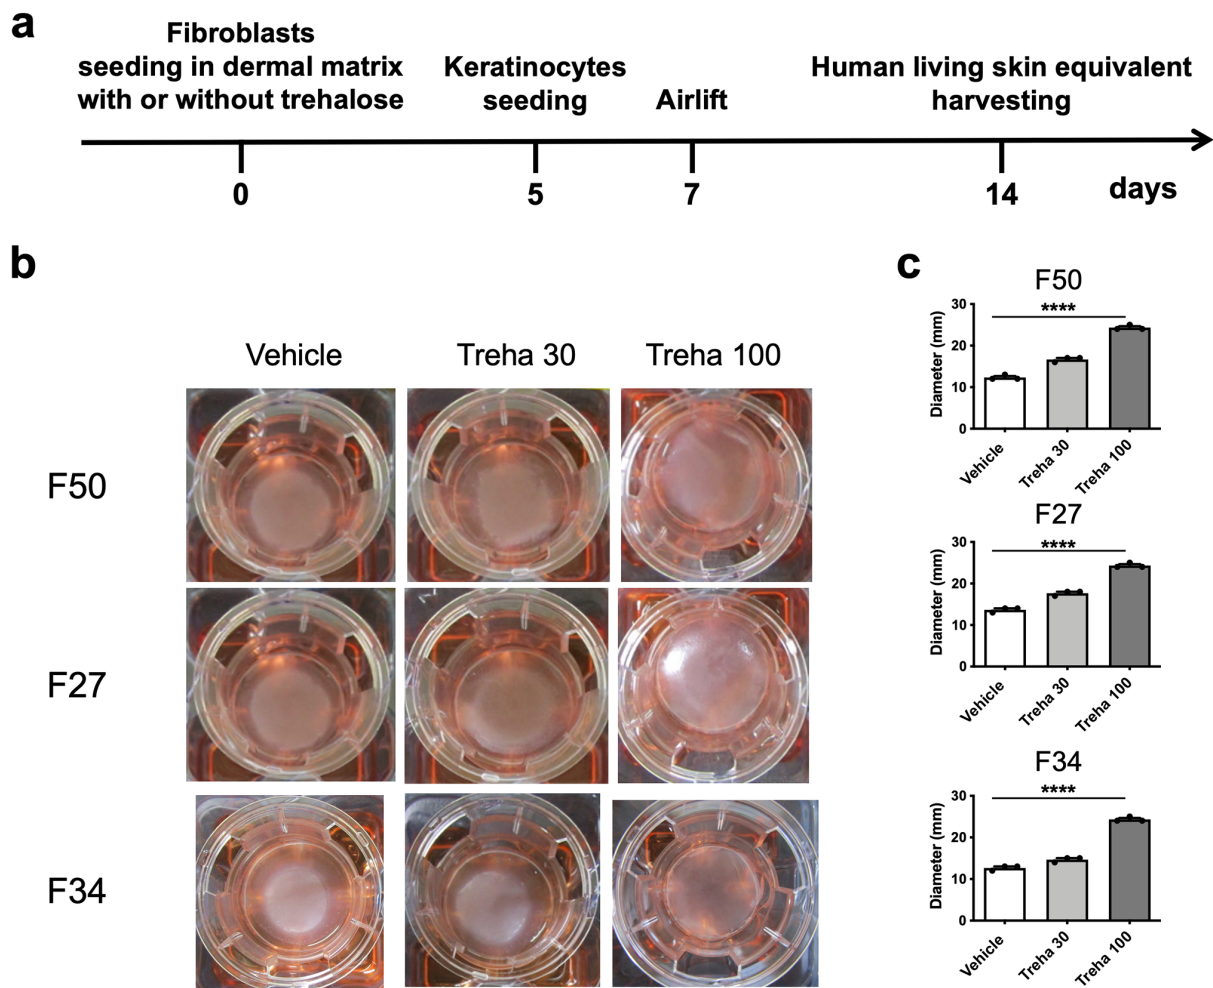

27

28 **Supplementary Figure 1. Effect of highly concentrated trehalose in the preparation of living**

29 **skin equivalents.** (a) A schematic for the preparation of cultured skin equivalents. (b) Macroscopic

30 pictures of LSEs with and without trehalose (30 and 100 mg/ml) added in the collagen gel. The gel

31 was prepared in the Transwell-COL with a 24-mm insert in a 6-well culture plate after 1 week of

32 airlifting at 37°C. (c) Diameters of LSEs with and without trehalose added in the collagen gel after

33 1 week of airlifting at 37°C. Data are expressed as means  $\pm$  SD for three LSEs. \*\*\*\*:  $P < 0.0001$

34 versus vehicle control groups by Student's *t*-test.

35

36

37  
38  
39  
40  
41  
42  
43  
44  
45  
46  
47  
48  
49  
50  
51  
52  
53  
54  
55  
56  
57  
58  
59  
60  
61  
62

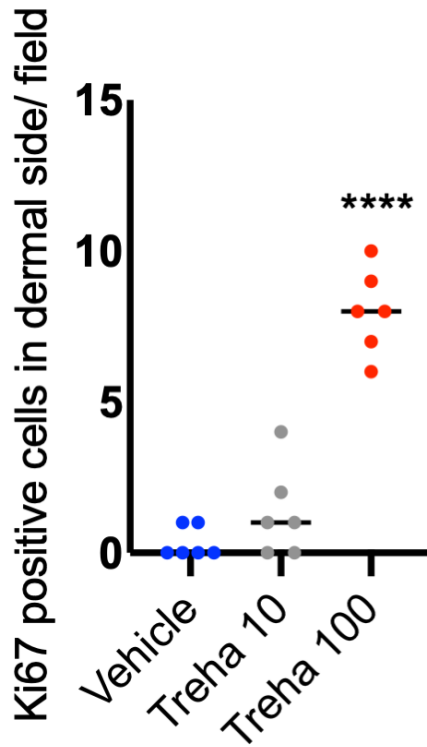

**Supplementary Figure 2. Quantification of immunostaining of living skin equivalents prepared with or without trehalose (10 and 100 mg/ml).** The numbers of Ki-67 positive cells in the dermal side of LSEs with and without trehalose added in the collagen gel after 1 week of airlifting at 37°C were counted in six randomly selected high-power fields. Data are expressed as means ± SD. \*\*\*\*;  $P < 0.0001$  versus vehicle control and trehalose (10 mg/ml) groups by one-way ANOVA.

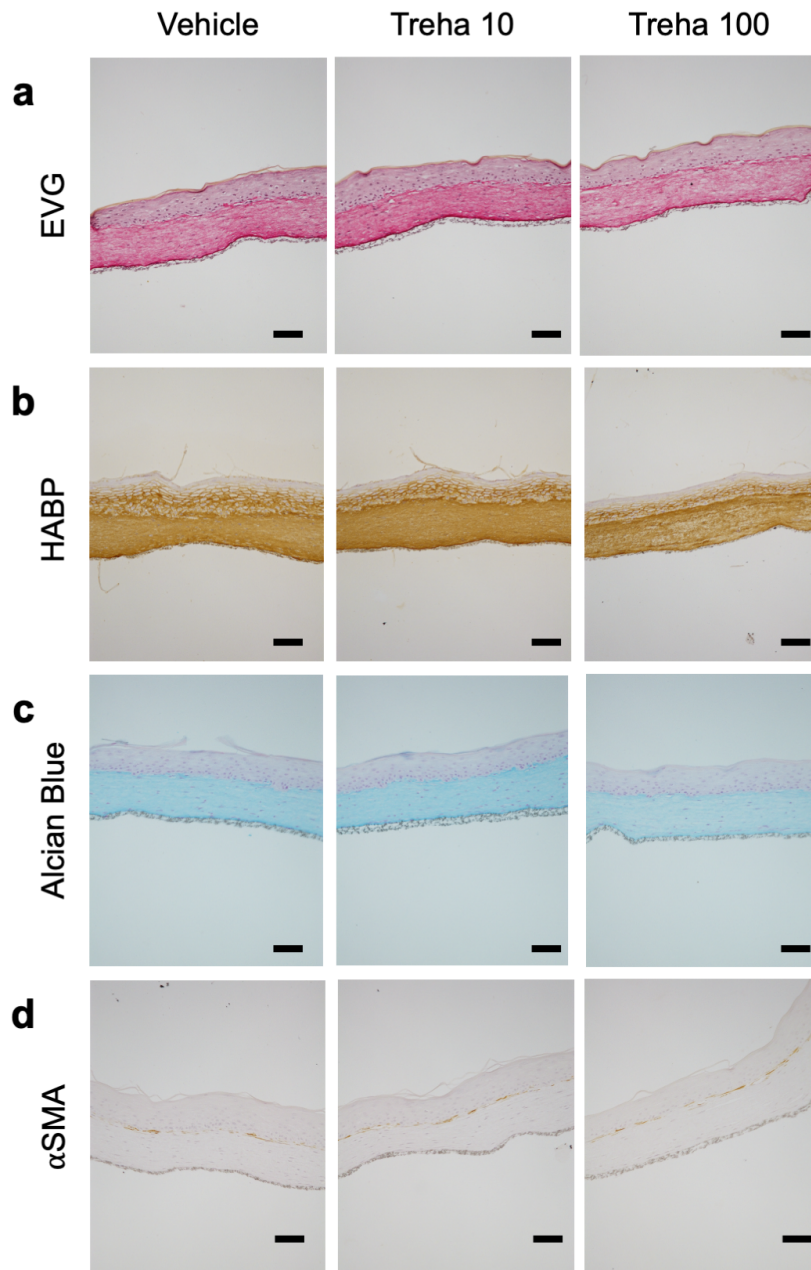

63  
 64 **Supplementary Figure 3. Immunostaining of living skin equivalents prepared with or without**  
 65 **trehalose (10 and 100 mg/ml).** Paraffin-embedded sections of LSEs were sectioned and subjected  
 66 to immunohistochemistry for Elastica van Gieson staining (**a**), hyaluronan-binding protein (HABP)  
 67 staining (**b**), Alcian blue staining, pH 2.5 (**c**),  $\alpha$ -SMA staining (**d**). Scale bar = 50  $\mu$ m.

68

Vehicle

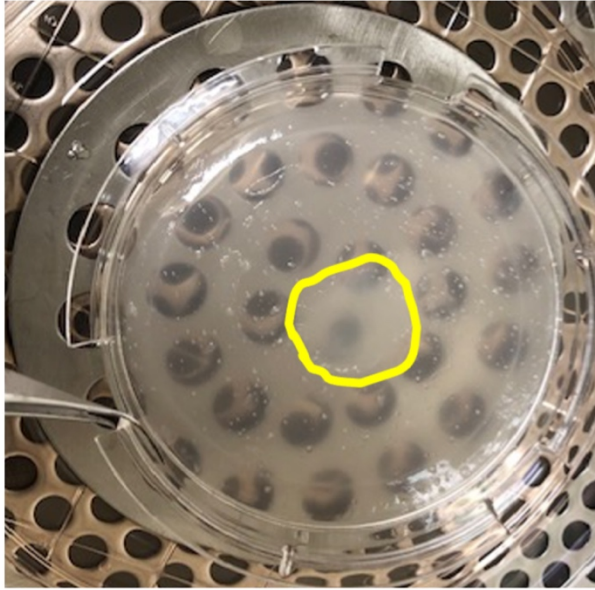

Treha 100

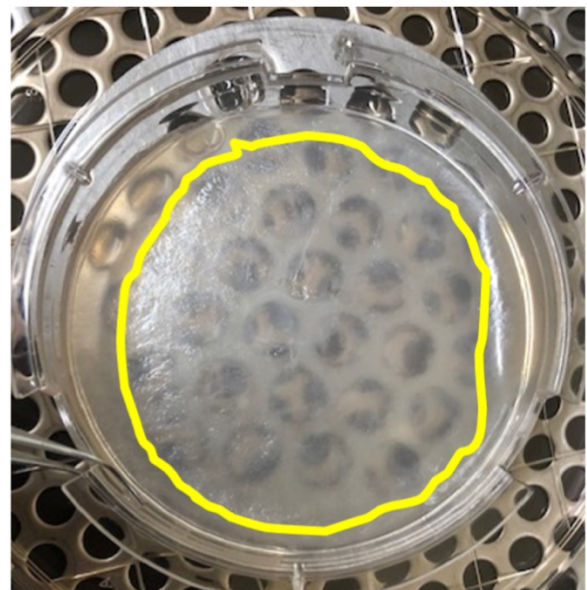

69

70 **Supplementary Figure 4. Novel effect of trehalose in the preparation of living skin equivalents.**

71 Representative picture of LSEs with or without trehalose (100 mg/ml) added in the collagen gel,  
72 which was prepared in a 100-mm dish after 2 weeks of airlifting at 37°C. Data are representative of  
73 two independent experiments.

74

75

76

77

78

79

### 2D Fibroblasts

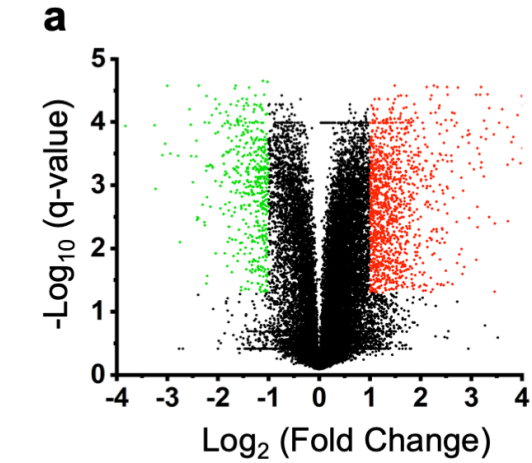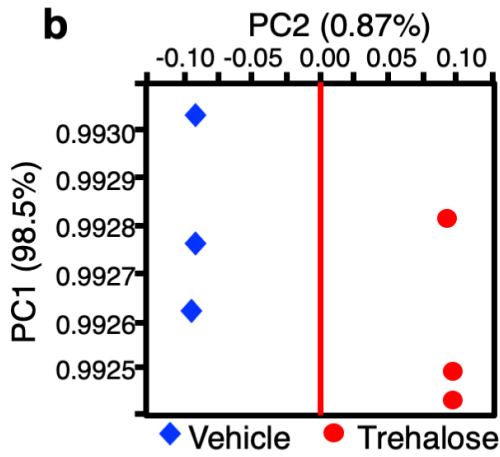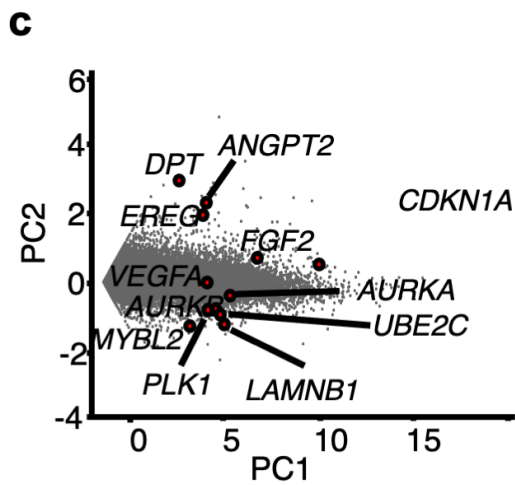

### 3D Fibroblasts

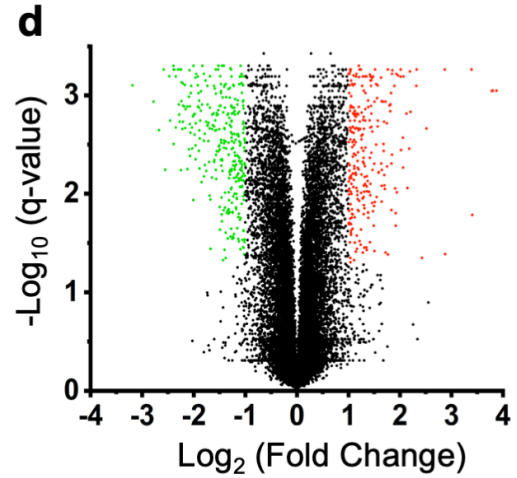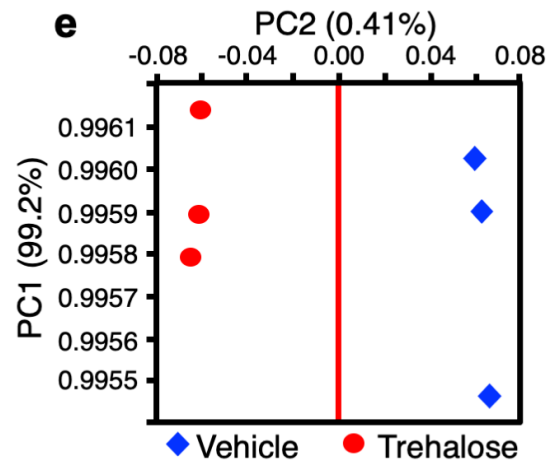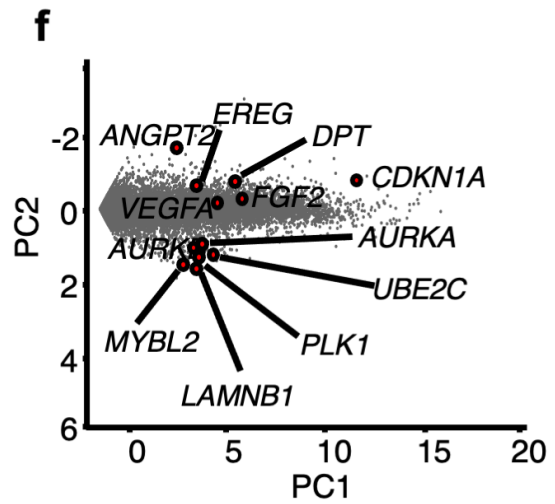

81 **Supplementary Figure 5. Gene expressions in highly concentrated trehalose-treated 2D and**  
82 **3D fibroblasts after whole transcriptome analysis by RNA-seq.** Volcano plots show that in the  
83 presence of trehalose (100 mg/ml) in 2D fibroblasts (**a**) and 3D fibroblasts (**d**), gene expressions  
84 were significantly modulated. Red or green rounds indicate genes upregulated by more than 2-fold  
85 or downregulated by less than 0.5-fold, respectively, with less than 0.05 of q-values. PCA showing  
86 the separation between PC1 and PC2 in 2D fibroblasts (**b**) and 3D fibroblasts (**e**). The factor  
87 loadings of PC1 and PC2 of the genes calculated by PCA were plotted. The plotted upper and  
88 lower genes were detected in 2D fibroblasts (**c**) or 3D fibroblasts (**f**).

89

90

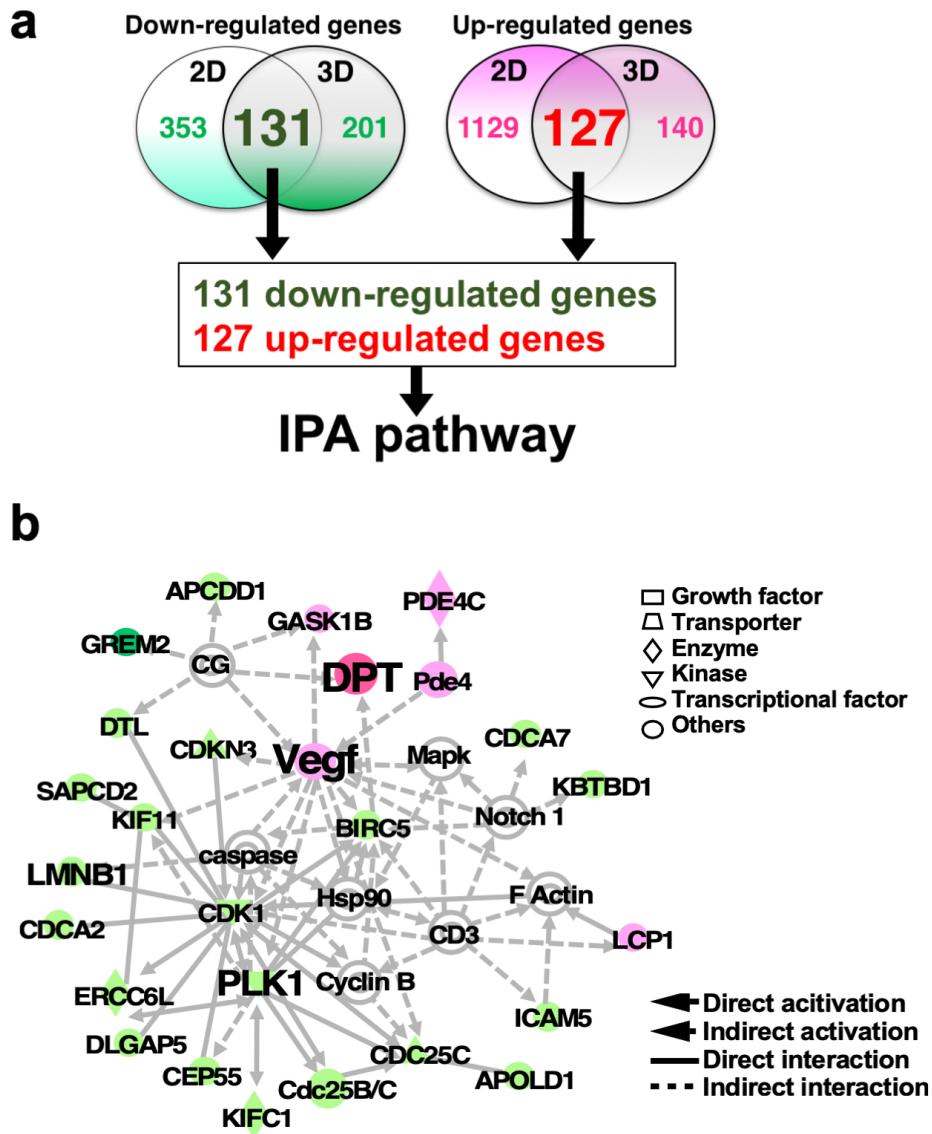

91  
92

93 **Supplementary Figure 6. Network analysis by IPA pathway using genes modulated by**  
 94 **trehalose.** (a) The Venn diagram demonstrates the number of downregulated and upregulated  
 95 genes analyzed in Fig. 2. The 131 downregulated genes and 127 upregulated genes were used for  
 96 an IPA. (b) A network detected by IPA demonstrated activation of DPT and Vegf, accompanied  
 97 by inhibition of PLK1, LMNB1, and CDK1. The red and green shapes demonstrate upregulated  
 98 and downregulated genes by trehalose, respectively.

99



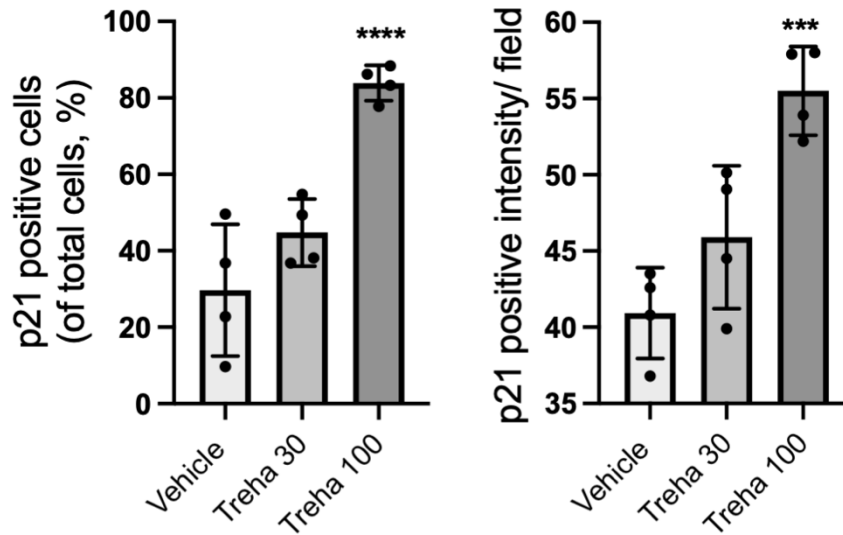

100

101 **Supplementary Figure 7. Trehalose modulates the expression of p21.** Human dermal fibroblasts  
 102 were treated with trehalose (30 and 100 mg/ml) or vehicle (PBS) for 24 h. The cells were stained  
 103 with an antibody against p21 and DAPI for nuclei, and both were observed using a fluorescence  
 104 microscope. In each group, we observed the relative number and intensity of fibroblasts stained by  
 105 the p21 antibody. Data are means  $\pm$  SD for four wells, and are representative of three experiments  
 106 with similar results. \*\*\*:  $P < 0.001$ , \*\*\*\*:  $P < 0.0001$  versus the control (vehicle-treated) fibroblasts  
 107 by one-way ANOVA.

108

109

110

111

112

113

114

115

116

117

118

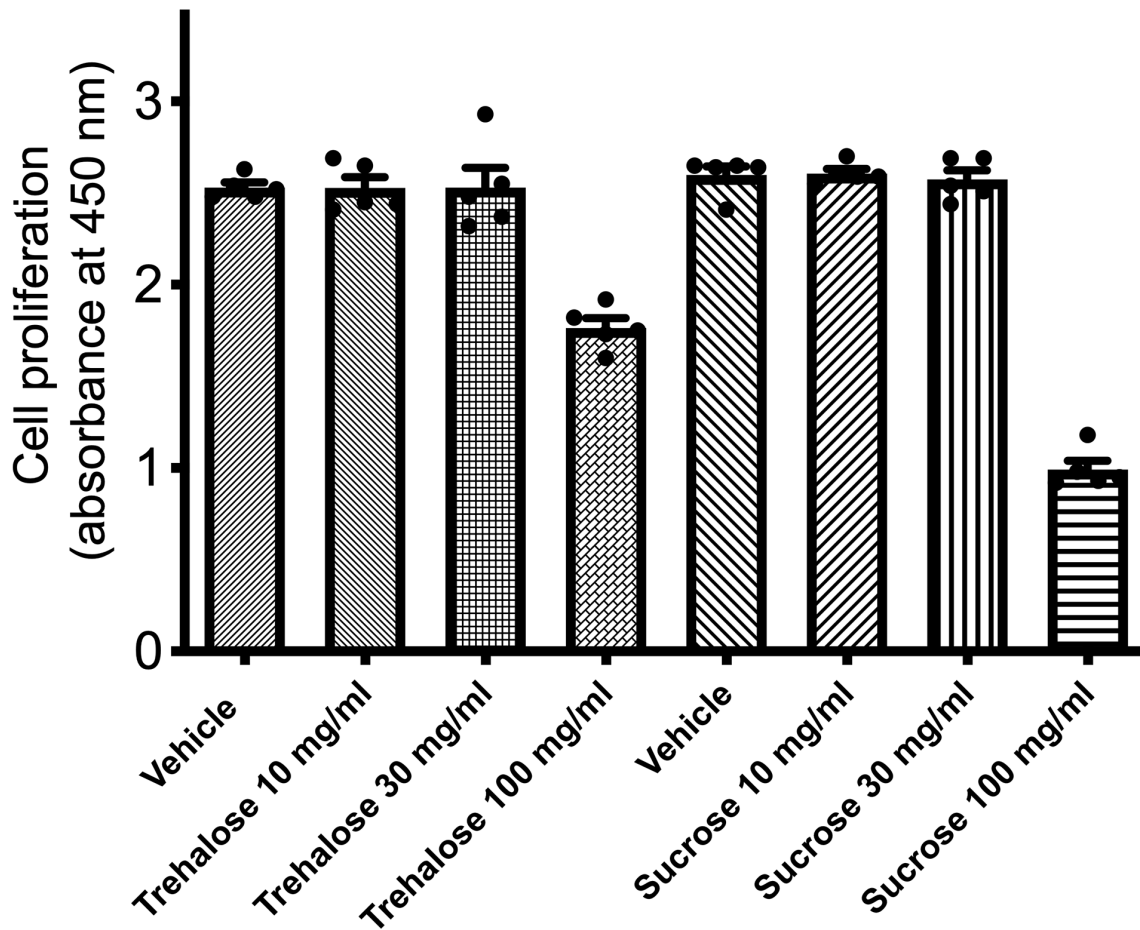

119  
 120 **Supplementary Figure 8. Proliferation assay with trehalose-treated human dermal fibroblasts.**  
 121 Proliferation assay with human dermal fibroblasts treated with trehalose (10, 30, and 100 mg/ml) or  
 122 vehicle for 24 h.

123  
 124  
 125  
 126  
 127  
 128  
 129  
 130

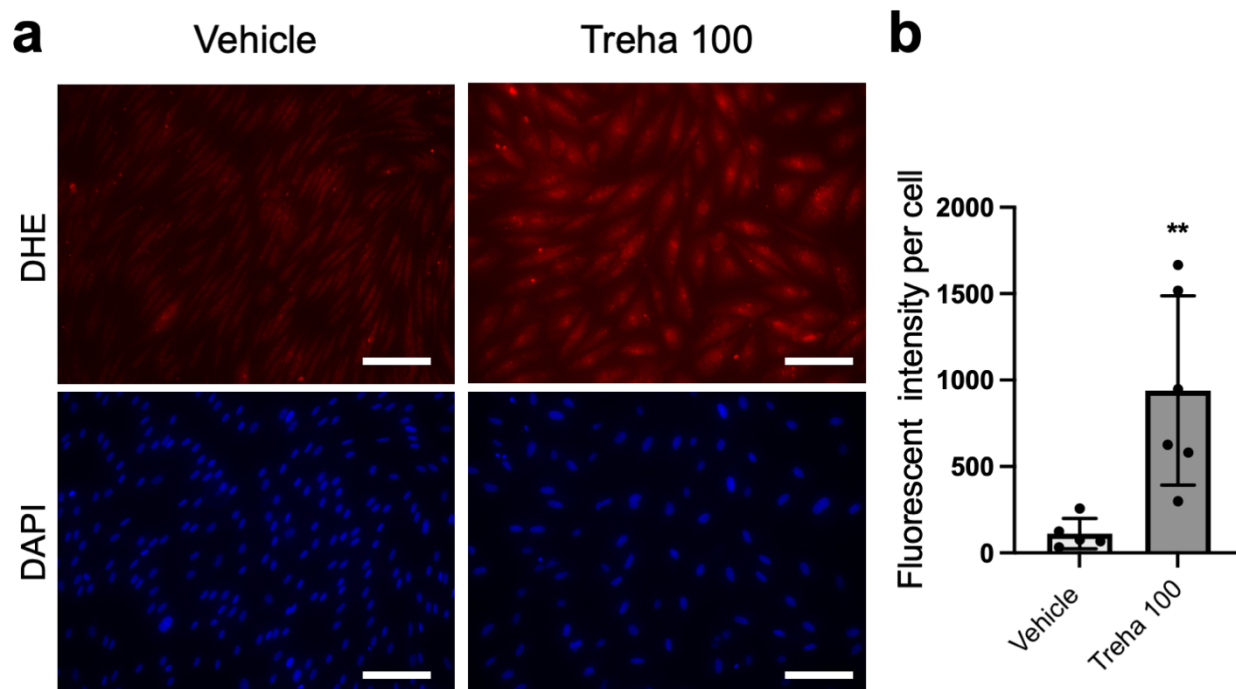

131  
 132 **Supplementary Figure 9. Fluorescent images of trehalose-treated fibroblasts stained with**  
 133 **DHE.** (a) Fibroblasts were treated with vehicle or trehalose (100 mg/ml) for 48 h and stained with  
 134 DAPI to visualize nuclei. Representative fluorescent images of DHE-treated cells were obtained by  
 135 fluorescence microscopy. (b) In each group, we observed the intensity per cell stained with DHE.  
 136 Data are means  $\pm$  SD for five wells (vehicle) and six wells (trehalose) and are representative of two  
 137 experiments with similar results. \*\*:  $P < 0.001$  versus the control (vehicle-treated) fibroblasts by  
 138 Student's *t*-test. Scale bar = 100  $\mu$ m.

139  
 140  
 141  
 142  
 143  
 144  
 145  
 146  
 147  
 148  
 149

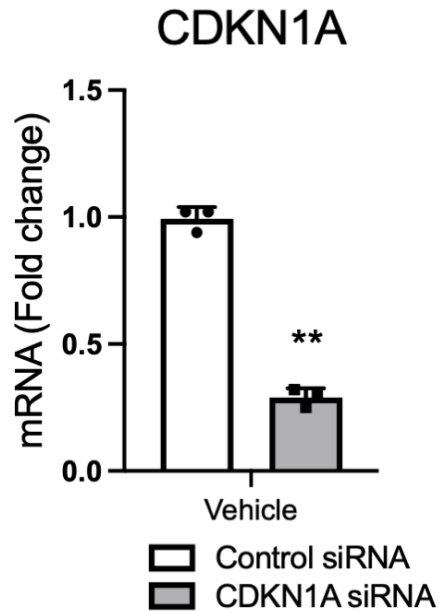

150

151 **Supplementary Figure 10. CDKN1A is involved in the promotion of wound healing with the**  
 152 **dermal substitute containing trehalose-treated fibroblasts.** *CDKN1A* mRNA levels were  
 153 assessed by qPCR after transfection with control or *CDKN1A* siRNA for 24 h. Expression data are  
 154 shown relative to the control siRNA-treated fibroblasts. Data are expressed as means  $\pm$  SD. \*\*:  $P <$   
 155 0.01 versus the control siRNA-treated group of vehicle-treated fibroblasts by Student's *t*-test.

156

157

| Gene Symbol | 2D Fibroblast                |            |            | 3D Fibroblast                |           |          |
|-------------|------------------------------|------------|------------|------------------------------|-----------|----------|
|             | Log <sub>2</sub> Fold Change | P value    | q value    | Log <sub>2</sub> Fold Change | P value   | q value  |
| CCL26       | 15.6887127                   | 2.0027E-05 | 0.00044792 | 1.705299024                  | 0.000739  | 0.008949 |
| CCL5        | 1.068414138                  | 0.45589618 | 0.45288915 | -0.173989996                 | 0.327876  | 0.492259 |
| CTSB        | 0.971606011                  | 0.06904278 | 0.1363981  | 0.335018077                  | 0.000016  | 0.001276 |
| CXCL1       | 1.068140074                  | 0.73874177 | 0.65627578 | -0.874653559                 | 0.002441  | 0.019497 |
| CXCL5       | 0.94567579                   | 0.75128719 | 0.66503826 | -0.777055659                 | 0.001055  | 0.011256 |
| IL1B        | 1.038811561                  | 0.37390097 | 0.38579554 | -0.000435529                 | 0.998081  | 0.929793 |
| IL8         | 0.749017012                  | 0.40241364 | 0.4091766  | -1.863078226                 | 0.000022  | 0.001431 |
| IL6         | 1.83106492                   | 0.03268861 | 0.07368166 | 0.560710784                  | 0.01188   | 0.058068 |
| IL6ST       | 0.768246043                  | 0.00028053 | 0.00211584 | -0.153220532                 | 0.008595  | 0.046269 |
| IL6R        | 0.961693449                  | 0.60541119 | 0.56747153 | 0.340425901                  | 0.022357  | 0.091428 |
| IL11        | 1.38408421                   | 0.00127207 | 0.00602665 | -0.641457641                 | 0.000063  | 0.002266 |
| GDF15       | 5.504128467                  | 5.3168E-06 | 0.00021386 | 2.204582142                  | 0.000023  | 0.001467 |
| ICAM3       | 1.10713058                   | 0.17158772 | 0.26835683 | -0.04654121                  | 0.784125  | 0.816121 |
| IGFBP2      | 0.816306772                  | 0.21727315 | 0.32304459 | 0.153371435                  | 0.499837  | 0.607437 |
| IGFBP4      | 0.676750709                  | 1.1438E-05 | 0.0003231  | -0.096631441                 | 0.019633  | 0.083265 |
| IGFBP6      | 0.599951743                  | 2.1271E-05 | 0.0004627  | -0.440933601                 | 0.000426  | 0.006395 |
| INHBA       | 0.919449668                  | 0.27440813 | 0.38579554 | 0.282262443                  | 0.002374  | 0.019129 |
| KITLG       | 1.193926054                  | 0.00022606 | 0.00185082 | 0.153844064                  | 0.005932  | 0.035706 |
| LIF         | 0.733713608                  | 0.00408197 | 0.01444751 | 0.198355932                  | 0.053675  | 0.173018 |
| MMP1        | 1.107060554                  | 0.00487661 | 0.01651    | 0.917704713                  | 0.000062  | 0.00226  |
| MMP3        | 1.286485945                  | 3.9542E-05 | 0.00063832 | 2.32521748                   | <0.000001 | 0.000541 |
| MMP10       | 1.466808305                  | 0.00679295 | 0.02126738 | 1.567801079                  | 0.000048  | 0.002069 |
| MMP12       | 1.614463727                  | 0.01064761 | 0.03018434 | 0.47100454                   | 0.058762  | 0.185098 |
| MMP14       | 0.555567434                  | 7.3144E-06 | 0.00025431 | 0.129684845                  | 0.003357  | 0.024065 |
| PLAT        | 2.985791621                  | 9.1255E-06 | 0.00028893 | -0.25587261                  | 0.025534  | 0.100313 |
| PLAU        | 0.699589106                  | 2.2605E-05 | 0.0004765  | -0.085737884                 | 0.136164  | 0.323803 |
| PLAUR       | 0.804912306                  | 0.00707554 | 0.02193321 | -0.448530887                 | 0.000271  | 0.004945 |
| SERPINB2    | 0.935304804                  | 0.55097058 | 0.52692515 | -0.108924632                 | 0.364082  | 0.492259 |
| TIMP1       | 0.899312334                  | 0.00046492 | 0.00295382 | -0.13252159                  | 0.01695   | 0.07489  |
| TNFRSF10C   | 4.022071381                  | 6.6203E-05 | 0.00085594 | 2.191704997                  | 0.000001  | 0.000567 |
| STC1        | 0.872968807                  | 0.08588855 | 0.16310923 | 0.268688045                  | 0.008082  | 0.044319 |
| HMGB1       | 0.749005876                  | 3.46E-05   | 0.00059345 | -0.672302379                 | 0.000018  | 0.001331 |
| CALR        | 0.844018275                  | 3.6457E-06 | 0.00017579 | -0.358529449                 | 0.000113  | 0.003023 |
| CD44        | 0.506002712                  | 1.0211E-07 | 5.1976E-05 | -0.126432638                 | 0.020103  | 0.084665 |
| S100A11     | 1.039862234                  | 0.11871843 | 0.20483225 | 0.06647586                   | 0.10953   | 0.293671 |
| LGALS3BP    | 0.807693816                  | 0.00822613 | 0.02470954 | -0.307984476                 | 0.016317  | 0.07301  |
| VCAN        | 0.720397578                  | 0.00094683 | 0.00486125 | -0.47473911                  | 0.000133  | 0.003325 |
| TNC         | 3.665322378                  | 1.0098E-07 | 5.1976E-05 | -0.100713946                 | 0.023494  | 0.094632 |
| HSPA5       | 0.749125475                  | 7.657E-06  | 0.00025961 | -0.618822695                 | 0.000002  | 0.000603 |
| HSP90AB1    | 0.748200289                  | 2.7946E-06 | 0.00015423 | -0.10722718                  | 0.012148  | 0.059095 |
| HSPA8       | 1.358284902                  | 1.1828E-05 | 0.00032903 | 0.014429089                  | 0.628248  | 0.707638 |
| HSPA1A      | 2.360615298                  | 1.9545E-06 | 0.00012892 | -0.659152755                 | 0.007447  | 0.041969 |
| HSP90AA1    | 1.105287269                  | 0.00070951 | 0.0039587  | -0.063762606                 | 0.018879  | 0.081054 |
| HSP90B1     | 0.645522626                  | 7.4136E-07 | 0.00010197 | -0.874711901                 | 0.000005  | 0.000797 |

158

159 **Supplementary Table 1. Expression of SASP factor genes induced by highly concentrated**  
160 **trehalose.** Analysis of RNA-seq data revealed that several genes associated with trehalose-  
161 induced premature senescence were upregulated.

162

163

164

165

166

167

| Gene symbol | Assay ID      | Gene Name                                |
|-------------|---------------|------------------------------------------|
| EREG        | Hs00914313_m1 | Epiregulin                               |
| AREG        | Hs00950669_m1 | Amphiregulin                             |
| GAPDH       | Hs02758991_g1 | Glyceraldehyde-3-Phosphate Dehydrogenase |
| ARG2        | Hs00982833_m1 | Arginase 2                               |
| PGF         | Hs00182176_m1 | Placental Growth Factor                  |
| VEGFA       | Hs00900055_m1 | Vascular Endothelial Growth Factor A     |
| DPT         | Hs00355056_m1 | Dermapontin                              |
| CCL2        | Hs00234140_m1 | C-C Motif Chemokine Ligand 2             |
| SPP1        | Hs00959010_m1 | Secreted Phosphoprotein 1                |
| IL1RN       | Hs00893626_m1 | Interleukin 1 Receptor Antagonist        |
| ANGPT2      | Hs00169867_m1 | Angiopoietin 2                           |
| AURKA       | Hs00269212_m1 | Aurora Kinase A                          |
| AURKB       | Hs00177782_m1 | Aurora Kinase B                          |
| AURKC       | Hs00152930_m1 | Aurora Kinase C                          |
| CDKN1A      | Hs00355782_m1 | Cyclin Dependent Kinase Inhibitor 1A     |
| PLK1        | Hs00983227_m1 | Polo Like Kinase 1                       |
| LMNB1       | Hs01059210_m1 | Lamin B1                                 |
| FGF2        | Hs00960934_m1 | Fibroblast Growth Factor 2               |
| MYBL2       | Hs00942540_m1 | MYB Proto-Oncogene Like 2                |
| UBE2C       | Hs00153153_m1 | Ubiquitin Conjugating Enzyme E2 C        |
| HIF1A       | Hs00152153_m1 | Hypoxia Inducible Factor 1 Subunit Alpha |

168

169

170

171 **Supplementary Table 2. TaqMan primers and probe assay ID (Applied Biosystems) of the**  
172 **genes used in real-time PCR.**

173

174

175

176

177

178

179

180

181 **Video 1.** The morphological alterations of the human dermal fibroblasts after vehicle treatment.  
182 Phase contrast microscopy imaging of the fibroblasts cultured with vehicle.

183 **Video 2.** The morphological alterations of the human dermal fibroblasts after the trehalose treatment  
184 (30 mg/ml). Phase contrast microscopy imaging of the fibroblasts cultured with trehalose.

185 **Video 3.** The morphological alterations of the human dermal fibroblasts after the trehalose treatment  
186 (100 mg/ml). Phase contrast microscopy imaging of the fibroblasts cultured with trehalose.

187 **Video 4.** The morphological alterations of the human dermal fibroblasts after the sucrose treatment  
188 (100 mg/ml). Phase contrast microscopy imaging of the fibroblasts cultured with sucrose.

189

190

191

192

193

194

195

196

197

198

199

200

201

202

203

204

205

206

207 **Supplementary blots**

208 Figure 4b blots

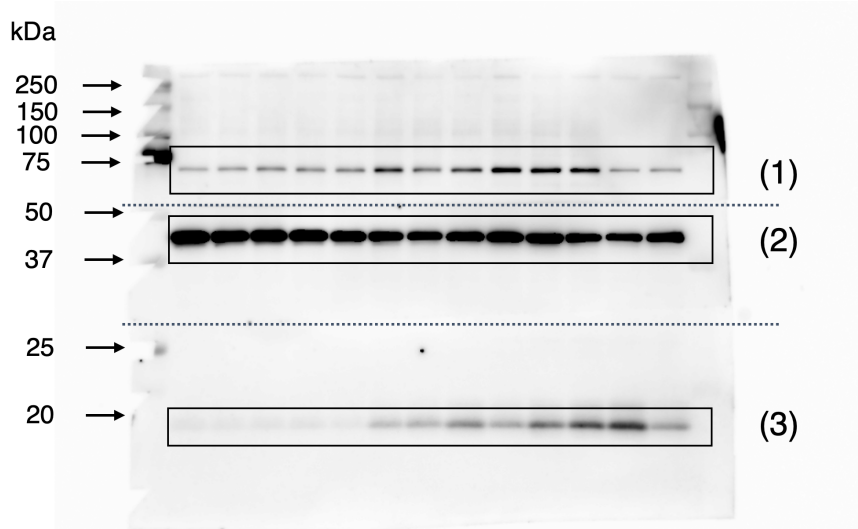

..... : Cut the membrane for each WB

|     | 1st Ab                                       | 2nd Ab                                           |
|-----|----------------------------------------------|--------------------------------------------------|
| (1) | LaminB (C-20), #sc-6216 ,Santacruz           | Anti goat IgG HRP conjugate,<br>#HAF109, R&D     |
| (2) | $\beta$ -actin, #ab6276, Abcam               | Anti mouse IgG HRP conjugate, #W402B,<br>PROMEGA |
| (3) | P21(12P1), #29475, Cell Signaling Technology | Anti rabbit HRP conjugate, #W4018,<br>PROMEGA    |

209  
210  
211  
212  
213  
214  
215  
216  
217  
218  
219  
220  
221  
222



223 Figure 5e blots

224

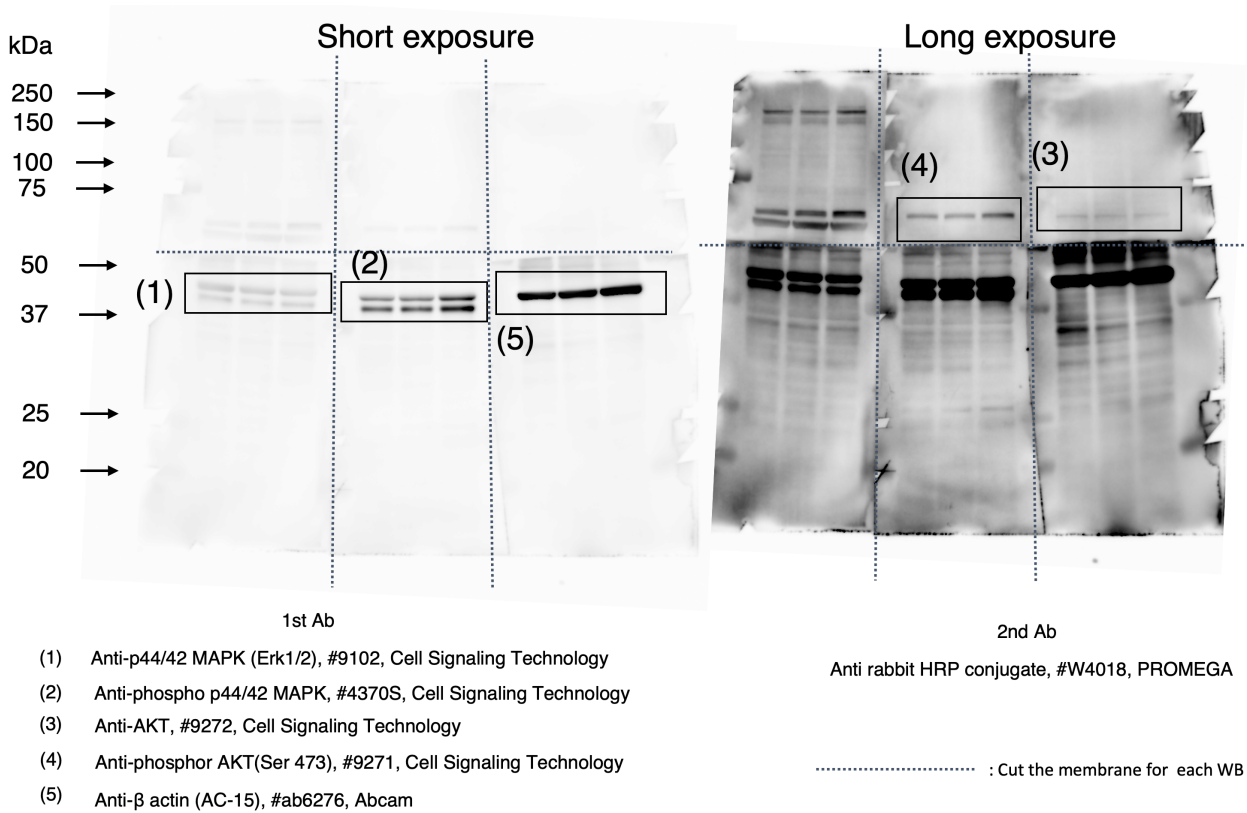

225

226

227

228

229

230

231

232

233

234

235

236

237

238

239 Figure 6c blots

240

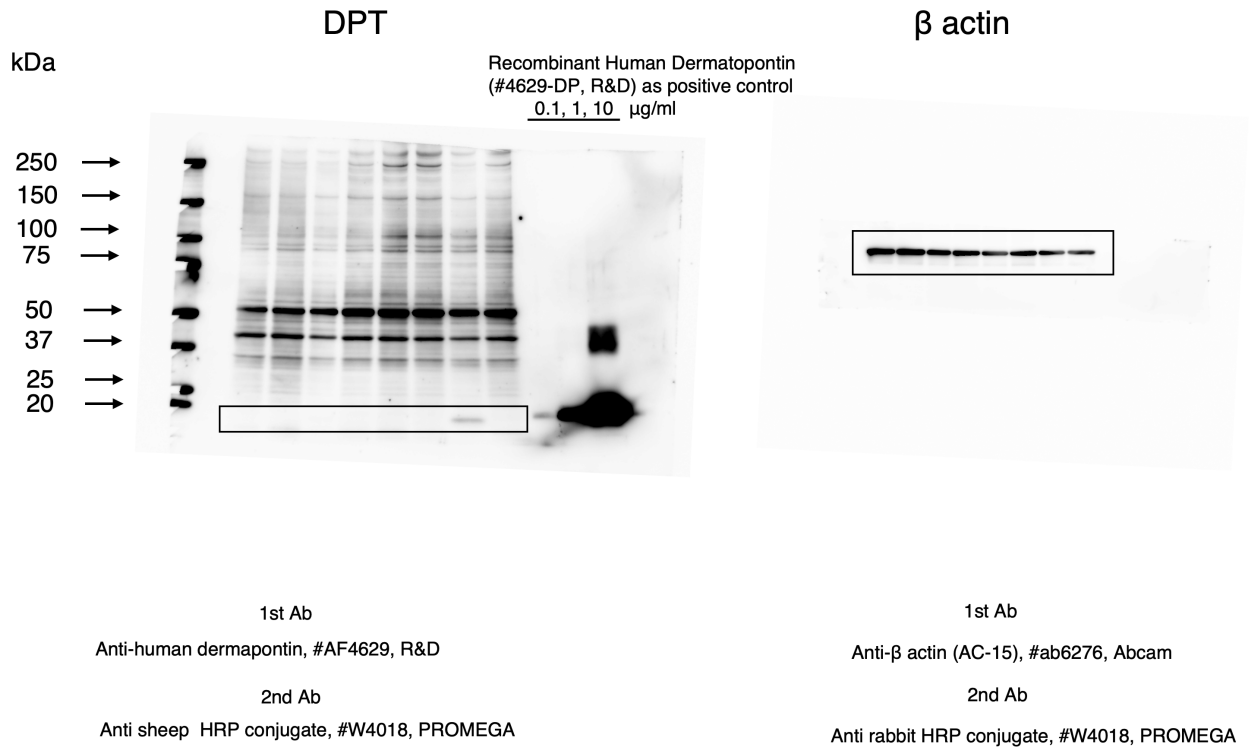

241

242
